# Supplementary material for: Comprehensive evaluation and prediction of heavy metals pollution in mining-affected soils: a case study of Guizhou, China
Source: Research Square preprint supplement (doi:10.21203/rs.3.rs-8641058/v1), 2026-01-28
Supplement: Supplementary file 1 [file 37bdf81250b65eb567b61c1d.docx]

**Comprehensive evaluation and prediction of heavy metals pollution in mining-affected soils: a case study of Guizhou, China**

Tianzhu Shi a, Huajie Xu a,*, Xiangui Wang a, Feng Xie b, Guanglin Song c, Qiong Lia, Ju Guo a, Xinliang Mo a, Shihuang Chen a, Jingyi Huang a, Huawei Chen a

a School of Brewing Engineering, Moutai Institute, Renhuai, GuiZhou 564500, China

b School of Food Engineering, Moutai Institute, Renhuai, GuiZhou 564500, China

c Guizhou Academy of Testing and Analysis, Guiyang, Guizhou 550002, China

*Correspondence author E-mail : [xuhuajie@mtxy.edu.cn](mailto:xuhuajie@mtxy.edu.cn) (H. Xu).

**Table S1** Sampling locations

| Sampling sites | Center coordinate | | Altitude (m) |
| --- | --- | --- | --- |
| Longitude (°E) | Latitude (°N) |
| S1 | 105.090322 | 26.462457 | 1758.3 |
| S2 | 105.090025 | 26.462575 | 1759.9 |
| S3 | 105.089598 | 26.462693 | 1763.4 |
| S4 | 105.08947 | 26.462906 | 1763.1 |
| S5 | 105.089435 | 26.463137 | 1761.0 |
| S6 | 105.089199 | 26.462916 | 1763.0 |
| S7 | 105.088917 | 26.463125 | 1758.4 |
| S8 | 105.087914 | 26.463399 | 1760.9 |
| S9 | 105.086865 | 26.464443 | 1753.6 |
| S10 | 105.087077 | 26.464669 | 1749.6 |
| S11 | 105.087088 | 26.464979 | 1754.5 |
| S12 | 105.085811 | 26.46494 | 1752.1 |
| S13 | 105.085497 | 26.465682 | 1739.3 |
| S14 | 105.085374 | 26.466025 | 1732.3 |
| S15 | 105.084971 | 26.466155 | 1737.1 |
| S16 | 105.081833 | 26.468551 | 1732.1 |
| S17 | 105.081625 | 26.470126 | 1755.1 |
| S18 | 105.081015 | 26.470371 | 1743.8 |
| S19 | 105.078046 | 26.470703 | 1746.1 |
| S20 | 105.076995 | 26.472890 | 1729.4 |

**Table S2** Classification for Igeo、PLI、Ei、PERI

| Rang | Pollution level | Rang | Pollution level | Rang | Risk level | Rang | Risk level |
| --- | --- | --- | --- | --- | --- | --- | --- |
| Igeo≤ 0 | Unpolluted | PLI< 1 | Unpolluted | Ei< 40 | Low | PERI< 150 | Low |
| 0< Igeo≤ 1 | Lightly polluted | 1≤ PLI< 2 | Medium pollution | 40≤ Ei < 80 | Moderate | 150≤ PERI< 300 | Moderate |
| 1< Igeo≤ 2 | Lightly to moderately polluted | 2≤ PLI< 3 | Strong pollution | 80≤ Ei < 160 | Considerable | 300≤PERI< 600 | Considerable |
| 2< Igeo≤ 3 | Moderately polluted | PLI≥ 3 | Extreme pollution | 160≤ Ei < 320 | High | PERI≥ 600 | High |
| 3< Igeo≤ 4 | Moderately to heavily polluted | - | - | Ei≥ 320 | Extreme | - | - |
| 4<Igeo≤ 5 | Heavily polluted | - | - | - | - | - | - |
| Igeo> 5 | Extremely polluted | - | - | - | - | - | - |

**Table S3** Exposure parameters for health risk assessment

| Parameters | Explanation | Unit | Probability distributions and values | |
| --- | --- | --- | --- | --- |
| Adults | Children |
| ED | Exposure age | a | Point (24) | Point (6) |
| EF | Exposure frequency | d/a | Triangular distribution (180,345,365) | |
| BW | Body weight | kg | Log-normal distribution (57.03, 1.18) | Log-normal distribution ( 16.68, 1.48) |
| AT | Exposure time | d | ED×365(Non-carcinogenic), 70×365(Carcinogenic) | |
| IRing | Ingestion rate | mg/d | Triangular distribution (4, 30, 52) | Triangular distribution (66, 103, 161) |
| IRinh | Inhalation rate | m3/d | Log-normal distribution (9.01, 1.26) | Log-normal distribution (7.71, 1.27) |
| PEF | Emission factors for soil particles | m3/kg | Point (1.36×109) | |
| 26SA | Surface area | cm2 | Triangular distribution (760, 1530, 4220) | Triangular distribution (430, 860, 2160) |
| SL | Skin adherence | mg/(cm2·d) | Log-normal distribution (0.49, 0.54) | Log-normal distribution (0.65, 1.2) |
| ABF | Skin absorption factor | Dimensionless | Point (0.001) | |

**Table S4** Values of RfD and SF

| Elements | RfD, mg/(kg·d) | | | SF, mg/(kg·d) | | |
| --- | --- | --- | --- | --- | --- | --- |
| ingestion | inhalation | dermal | ingestion | inhalation | dermal |
| Cd | 1.00×10-3 | 1.00×10-5 | 1.00×10-5 | 6.10 | 6.30 | 6.1 |
| Cu | 4.00×10-2 | 4.02×10-2 | 1.20×10-2 | − | − | − |
| Pb | 3.50×10-3 | 3.52×10-3 | 5.25×10-4 | 8.50×10-3 | 4.20×10-2 | − |
| Cr | 3.00×10-3 | 2.86×10-5 | 6.00×10-5 | 0.5 | 42.0 | 20 |
| Zn | 3.00×10-1 | 3.00×10-1 | 6.00×10-2 | − | − | − |
| Ni | 2.00×10-2 | 9.00×10-5 | 5.40×10-3 | 1.70 | 0.84 | 42.5 |
| As | 3.00×10-4 | 1.23×10-4 | 1.23×10-4 | 1.50 | 15.1 | 3.66 |
| Hg | 3.00×10-4 | 8.57×10-5 | 2.10×10-5 | − | − | − |

**Table S5** Eigenvalues and contributions of PCA

| Principal component | Eigenvalue | Percentage of variance (%) | Cumulative (%) |
| --- | --- | --- | --- |
| 1 | 3.99 | 49.8 | 49.8 |
| 2 | 1.44 | 18.0 | 67.8 |
| 3 | 1.22 | 15.2 | 83.0 |
| 4 | 0.556 | 6.95 | 90.0 |
| 5 | 0.339 | 4.24 | 94.2 |
| 6 | 0.292 | 3.65 | 97.8 |
| 7 | 0.108 | 1.34 | 99.2 |
| 8 | 0.0647 | 0.809 | 100 |

**Table S6** Initial risks to the soil ecosystem

| Communities | Elements | Si | Pex | Pox | Px | RIx | Ri |
| --- | --- | --- | --- | --- | --- | --- | --- |
| Vegetation (V) | Cd | 0.3 | 1.0 | 1 | 1.00 | 0.8272 | 0.2482 |
| Cu | 0.3 | 0.3 | 1 | 0.300 | 0.2293 | 0.0206 |
| Pb | 0.3 | 1.0 | 1 | 1.00 | 0.9536 | 0.2861 |
| Zn | 0.3 | 1.0 | 1 | 1.00 | 0.8496 | 0.2549 |
| As | 0.3 | 0.3 | 1 | 0.300 | 0.2053 | 0.0185 |
| Hg | 0.3 | 0.5 | 1 | 0.500 | 0.6367 | 0.0955 |
| Soil microorganisms (SM) | Cd | 0.5 | 1.0 | 1 | 1.00 | 0.8272 | 0.4136 |
| Cu | 0.5 | 0.3 | 1 | 0.300 | 0.2293 | 0.0344 |
| Pb | 0.5 | 1.0 | 1 | 1.00 | 0.9536 | 0.4768 |
| Zn | 0.5 | 1.0 | 1 | 1.00 | 0.8496 | 0.4248 |
| As | 0.5 | 0.3 | 1 | 0.300 | 0.2053 | 0.0308 |
| Hg | 0.5 | 0.5 | 1 | 0.500 | 0.6367 | 0.1592 |

**Fig. S1** Amount of direct and indirect risk input of components (E for the external environment)

**Fig. S2** Sensitivity distribution of non-carcinogenic parameters (a) and carcinogenic parameters (b)

**Fig. S3** Prediction of dynamic environmental capacity
